# Supplementary material for: Molecular Characterization and Pathogenicity of Staphylococcus aureus Isolated from Benin-City, Nigeria
Source: PubMed Central journal article supplement (PMC7356805; doi:10.3390/microorganisms8060912), 2020-06-16
Supplement: microorganisms-08-00912-s001.pdf [file microorganisms-08-00912-s001.pdf]

**Supplementary Table S1.** 109 traits in the MRSA-MSSA pairs, including molecular characteristics, antibiotic resistance genes, prophage carriage, and virulence genes.

|                                    |                                          | ST7-MRSA-V           | ST7-MSSA             | ST1-MRSA-V             | ST1-MSSA              | ST152-MRSA-V         | ST152-MSSA            |
|------------------------------------|------------------------------------------|----------------------|----------------------|------------------------|-----------------------|----------------------|-----------------------|
|                                    |                                          | Clone #8<br>(NGA102) | Clone #10<br>(NGA76) | Clone #13<br>(NGA104a) | Clone #14<br>(NGA66a) | Clone #30<br>(NGA71) | Clone #32<br>(NGA84b) |
| <b>Molecular Characteristics</b>   | PVL                                      | -                    | -                    | +                      | +                     | +                    | +                     |
|                                    | <i>arcA</i>                              | -                    | -                    | -                      | -                     | -                    | -                     |
|                                    | SCC <sub>mec</sub> Type                  | V                    | -                    | V                      | -                     | V                    | -                     |
|                                    | <i>agr</i>                               | I                    | I                    | III                    | III                   | I                    | I                     |
|                                    | <i>spa</i> Type                          | t091                 | t091                 | t1931                  | t127                  | t4690                | t355                  |
|                                    | MLST Type                                | ST7                  | ST7                  | ST1                    | ST1                   | ST152                | ST152                 |
| <b>Antibiotic resistance genes</b> | Membrane transporter                     | +                    | +                    | +                      | +                     | +                    | +                     |
|                                    | Quinolone resistance protein             | +                    | +                    | +                      | +                     | -                    | -                     |
|                                    | Beta-lactamase                           | +                    | +                    | +                      | +                     | +                    | -                     |
|                                    | Undecaprenyl pyrophosphate phosphatase   | +                    | +                    | +                      | +                     | +                    | +                     |
|                                    | Tetracycline resistance protein TetM     | -                    | -                    | -                      | -                     | -                    | -                     |
|                                    | Penicillin-binding protein 2'            | +                    | -                    | +                      | -                     | +                    | -                     |
|                                    | Fosfomycin resistance protein FosB       | -                    | -                    | -                      | -                     | -                    | -                     |
|                                    | MATE efflux family protein               | +                    | +                    | -                      | -                     | -                    | -                     |
|                                    | Aminoglycoside 3' phosphotransferase     | -                    | +                    | -                      | -                     | -                    | -                     |
|                                    | N-acetyltransferase                      | +                    | -                    | -                      | -                     | -                    | -                     |
|                                    | MFS family major facilitator transporter | -                    | -                    | -                      | -                     | +                    | +                     |
| <b>Prophage</b>                    | φSa1                                     | +                    | +                    | -                      | -                     | -                    | -                     |
|                                    | φSa2                                     | -                    | -                    | +                      | +                     | +                    | +                     |
|                                    | φSa3                                     | +                    | +                    | +                      | +                     | +                    | +                     |
|                                    | φSa5                                     | -                    | -                    | -                      | -                     | -                    | +                     |
|                                    | φSa9                                     | +                    | +                    | -                      | -                     | -                    | -                     |
| <i>C. elegans</i>                  | Calibrated Death                         | 0.1                  | 0.2                  | 0.5                    | 0.1                   | 0.3                  | 0.1                   |
| <b>Virulence genes</b>             |                                          |                      |                      |                        |                       |                      |                       |
| <b>Acyl carrier protein</b>        | <i>acpXL</i>                             | +                    | +                    | +                      | +                     | +                    | +                     |
| <b>Adherence</b>                   | <i>map</i>                               | +                    | +                    | +                      | +                     | -                    | -                     |
|                                    | <i>sdrC</i>                              | +                    | +                    | +                      | +                     | -                    | -                     |

|                         |              |   |   |   |   |   |   |
|-------------------------|--------------|---|---|---|---|---|---|
|                         | <i>sdrD</i>  | + | + | + | + | + | + |
|                         | <i>sdrE</i>  | + | + | + | + | + | + |
|                         | <i>bbp</i>   | - | - | - | - | - | - |
|                         | <i>epbs</i>  | + | + | + | + | + | + |
|                         | <i>clfA</i>  | - | - | + | + | - | - |
|                         | <i>fnbB</i>  | + | + | + | + | + | + |
|                         | <i>fnbA</i>  | + | + | + | + | + | + |
|                         | <i>clfB</i>  | - | - | + | + | - | - |
|                         | <i>icaR</i>  | + | + | + | + | + | + |
|                         | <i>icaA</i>  | + | + | + | + | + | + |
|                         | <i>icaD</i>  | + | + | + | + | + | + |
|                         | <i>icaB</i>  | + | + | + | + | + | + |
|                         | <i>icaC</i>  | + | + | + | + | + | + |
|                         | <i>cna</i>   | - | - | - | + | + | - |
| <b>Antiphagocytosis</b> | <i>cap8A</i> | + | + | + | + | + | + |
|                         | <i>cap8B</i> | + | + | + | + | + | + |
|                         | <i>cap8C</i> | + | + | + | + | + | + |
|                         | <i>cap8D</i> | + | + | + | + | + | + |
|                         | <i>cap8E</i> | + | + | + | + | + | + |
|                         | <i>cap8F</i> | + | + | + | + | + | + |
|                         | <i>cap8G</i> | + | + | + | + | + | + |
|                         | <i>cap8H</i> | + | + | - | + | - | - |
|                         | <i>cap8I</i> | + | + | + | + | - | - |
|                         | <i>cap8J</i> | + | + | + | + | - | - |
|                         | <i>cap8K</i> | + | + | + | + | - | - |
|                         | <i>cap8L</i> | + | + | + | + | + | + |
|                         | <i>cap8M</i> | + | + | + | + | + | + |
|                         | <i>cap8N</i> | + | + | + | + | + | + |
|                         | <i>cap8O</i> | + | + | + | + | + | + |
|                         | <i>cap8P</i> | + | + | + | + | + | + |
| <b>Exoenzyme</b>        | <i>coa</i>   | + | + | + | + | + | + |
|                         | <i>v8</i>    | + | + | + | + | - | - |
|                         | <i>vWbp</i>  | + | + | + | + | + | + |
|                         | <i>sak</i>   | + | + | + | + | + | + |
|                         | <i>geh</i>   | + | + | + | + | + | + |
|                         | <i>sspC</i>  | + | + | + | + | + | + |
|                         | <i>sspB</i>  | + | + | + | + | + | + |
|                         | <i>sspA</i>  | + | + | + | + | + | + |

|                         |                     |             |   |   |   |   |   |
|-------------------------|---------------------|-------------|---|---|---|---|---|
|                         | <i>aur</i>          | +           | + | + | + | + | + |
|                         | <i>hysA</i>         | +           | + | + | + | + | + |
| <b>+Immune evasion</b>  | <i>adsA</i>         | +           | + | + | + | + | + |
|                         | <i>scn</i>          | +           | + | + | + | + | + |
|                         | <i>spa</i>          | +           | + | + | + | + | + |
|                         | <i>sbi</i>          | +           | + | + | + | + | + |
|                         | <i>scn</i>          | +           | + | + | + | + | + |
|                         | <i>chp</i>          | -           | - | + | + | - | - |
|                         | <b>+Iron uptake</b> | <i>isdD</i> | + | + | + | + | + |
| <i>isdF</i>             |                     | +           | + | + | + | + | + |
| <i>srtB</i>             |                     | +           | + | + | + | + | + |
| <i>isdB</i>             |                     | +           | + | + | + | + | + |
| <i>isdA</i>             |                     | +           | + | + | + | + | + |
| <i>isdC</i>             |                     | +           | + | + | + | + | + |
| <i>isdE</i>             |                     | +           | + | + | + | + | + |
| <i>isdG</i>             |                     | +           | + | + | + | + | + |
| <b>Secretion system</b> | <i>esxA</i>         | +           | + | + | + | + | + |
|                         | <i>esaA</i>         | +           | + | + | + | + | + |
|                         | <i>essA</i>         | +           | + | + | + | + | + |
|                         | <i>esaB</i>         | +           | + | + | + | + | + |
|                         | <i>essB</i>         | +           | + | + | + | + | + |
|                         | <i>essC</i>         | +           | + | + | + | + | + |
|                         | <i>esaC</i>         | +           | + | + | + | + | + |
|                         | <i>esxB</i>         | +           | + | + | + | + | + |
| <b>Stress protein</b>   | <i>KatA</i>         | +           | + | + | + | + | + |
|                         | <i>clpC</i>         | +           | + | + | + | + | + |
|                         | <i>clpP</i>         | +           | + | + | + | + | + |
| <b>Cytotoxin</b>        | <i>hly/hla</i>      | +           | + | + | + | + | + |
|                         | <i>hld</i>          | +           | + | + | + | + | + |
|                         | <i>hlgA</i>         | +           | + | + | + | + | + |
|                         | <i>hlgC</i>         | +           | + | + | + | + | + |
|                         | <i>hlgB</i>         | +           | + | + | + | + | + |
|                         | <i>hly</i>          | +           | + | + | + | + | + |
| <b>Toxic shock</b>      | <i>tst</i>          | -           | - | - | - | - | - |
| <b>Enterotoxin</b>      | <i>seh</i>          | -           | - | + | + | - | - |
|                         | <i>sei</i>          | -           | - | - | - | - | - |
|                         | <i>sej</i>          | -           | - | - | - | - | - |
|                         | <i>sek</i>          | -           | - | - | + | - | - |

|                                         |                |   |   |   |   |   |   |
|-----------------------------------------|----------------|---|---|---|---|---|---|
|                                         | <i>seq</i>     | - | - | - | + | - | - |
|                                         | <i>sea</i>     | + | + | - | - | - | - |
|                                         | <i>seb</i>     | - | - | - | - | - | - |
|                                         | <i>sec</i>     | - | - | - | - | - | - |
|                                         | <i>sed</i>     | - | - | - | - | - | - |
|                                         | <i>see</i>     | - | - | - | - | - | - |
|                                         | <i>seg</i>     | - | - | - | - | - | - |
| <b>Panton-Valentine leukocidin</b>      | <i>lukF-PV</i> | + | + | + | + | + | + |
|                                         | <i>lukS-PV</i> | - | - | + | + | + | + |
| <b>Exfoliative toxin</b>                | <i>eta</i>     | - | - | - | - | - | - |
|                                         | <i>etb</i>     | - | - | - | - | - | - |
| <b>Triacylglycerol lipase precursor</b> | <i>lip</i>     | + | + | + | + | + | + |

Note: +, strain contains the gene or element; -, strain does not contain the gene or element.
